# Supplementary material for: From the chlorophyll a in the surface layer to its vertical profile: a Greenland Sea relationship for satellite applications
Source: Copernicus journal article supplement (doi:10.5194/os-9-431-2013), 2013-04-09
Supplement: Supplementary file 1 [file os-9-431-2013-supplement.tar]

The file includes a table with the coefficients  $A$ ,  $\mu$  and  $\sigma$  for the Gaussians fitted to monthly resolved median chlorophyll profiles extrapolated and interpolated for the range from 0 till 5 mg C m<sup>-3</sup> with 0.1 mg C m<sup>-3</sup> resolution of the surface chlorophyll. Giving the surface chlorophyll value and month as the input parameters user can reproduce the approximate Greenland Sea chlorophyll profile using Eq. (5).
